# Supplementary material for: The confusion effect when attacking simulated three-dimensional starling flocks
Source: PubMed Central journal article supplement (PMC5319319; doi:10.1098/rsos.160564), 2017-01-18
Supplement: rsos160564supp1.pdf [file rsos160564supp1.pdf]

Further analysis of prey movement within flocks of varying size and density was undertaken. Fifty flocks were simulated for each combination of flock size and density, and the prey behaviour over the first 7.5 seconds (the average trial length during the experiment) was recorded and averaged. We calculated the curvature of the prey trajectory to understand if prey in larger flocks took more complex paths. Curvature was calculated with the following formula, where  $r$  is the position at time  $t$ ,  $r'$  the velocity,  $r''$  the acceleration:

$$K(t) = \frac{|\vec{r}'(t) \times \vec{r}''(t)|}{|\vec{r}'(t)|^3}$$

In addition, in order to study whether the motion of prey differs between group sizes and densities, the mean and standard deviation of prey speed and linear acceleration was measured. We found that prey movement did vary by flock size and density (see Table 2).

To investigate whether these measures of prey movement, rather than group size or density *per se*, better predicted the patterns of targeting error and hunting time further analysis was undertaken. Comparisons of the AIC values of independent Generalised linear models each using one prey movement measures to predict targeting error and hunting time, against those selected in the main analysis indicate that no prey movement measures predict targeting error or hunting time better than flock size or density (see table 1). This indicates that prey behaviour did not have greater influence on hunting time or targeting error than group size or density. However, the speed at which participant approached targets was better predicted by some prey movement measures than by group size. The average approach speed of the predator appears to have been influenced positively by increases in curvature and the variation in curvature of prey trajectory, as well as by variation in linear acceleration, and negatively by prey speed.

Table 1 – AIC values for generalised linear models fitting targeting error, hunting time, and participant average approach speed, against each prey behavioural measure individually (with participant as a random factor). These values can be compared to the AIC value of the selected models from the original analysis. Values of AIC that are lower than those from selected models suggest that the prey behavioural measure had more influence than the factors in the selected statistical model. For targeting error, the selected model fitted error against flock density and a quadratic polynomial of flock size, with the two way interaction between these factors, and had AIC=1303.723. For hunting time, the selected model fitted hunting time against a quadratic polynomial of flock size, and had AIC=1353.875. For approach speed, the selected model fitted approach speed against a quadratic polynomial of flock size, and had AIC=-65.588. Values of AIC which are lower than those of the respective selected model from the original analysis are in bold.

|                     |      | Targeting Error | Hunting Time | Approach Speed |
|---------------------|------|-----------------|--------------|----------------|
| Prey Speed          | Mean | 1366.303        | 1370.946     | <b>-65.898</b> |
|                     | SD   | 1508.664        | 1393.793     | -56.597        |
| Curvature           | Mean | 1495.133        | 1380.974     | <b>-69.747</b> |
|                     | SD   | 1499.301        | 1374.663     | <b>-77.117</b> |
| Linear Acceleration | Mean | 1495.577        | 1384.699     | -57.387        |
|                     | SD   | 1456.077        | 1369.446     | <b>-66.831</b> |

Table 2 - Table of measures of prey movement by flock size and density; values represent the mean and standard deviation from 50 simulated flocks of each combination of flock density and size.

| Flock Size | Flock Density | Prey Speed (m/s) |        | Curvature (1/m)       |                       | Linear Acceleration (m/s <sup>2</sup> ) |        |
|------------|---------------|------------------|--------|-----------------------|-----------------------|-----------------------------------------|--------|
|            |               | Mean             | SD     | Mean                  | SD                    | Mean                                    | SD     |
| 1          | dense         | 13.6194          | 0.0177 | $1.93 \times 10^{-5}$ | $1.76 \times 10^{-6}$ | 0.0934                                  | 0.0033 |
| 1          | normal        | 13.6201          | 0.0346 | $1.98 \times 10^{-5}$ | $4.33 \times 10^{-6}$ | 0.0964                                  | 0.0106 |
| 1          | loose         | 13.6062          | 0.0081 | $1.86 \times 10^{-5}$ | $9.64 \times 10^{-7}$ | 0.0936                                  | 0.0064 |
| 50         | dense         | 13.6123          | 0.0564 | $4.36 \times 10^{-5}$ | $3.38 \times 10^{-6}$ | 0.9382                                  | 0.1647 |
| 50         | normal        | 13.5990          | 0.0417 | $3.33 \times 10^{-5}$ | $3.27 \times 10^{-6}$ | 0.5275                                  | 0.1095 |
| 50         | loose         | 13.6028          | 0.0322 | $2.68 \times 10^{-5}$ | $3.13 \times 10^{-6}$ | 0.3094                                  | 0.0557 |
| 250        | dense         | 13.6049          | 0.0321 | $3.74 \times 10^{-5}$ | $3.44 \times 10^{-6}$ | 0.7786                                  | 0.1301 |
| 250        | normal        | 13.6143          | 0.0213 | $2.91 \times 10^{-5}$ | $2.59 \times 10^{-6}$ | 0.3928                                  | 0.0645 |
| 250        | loose         | 13.6039          | 0.0235 | $2.46 \times 10^{-5}$ | $3.86 \times 10^{-6}$ | 0.2634                                  | 0.0487 |
| 1000       | dense         | 13.5133          | 0.0223 | $2.43 \times 10^{-5}$ | $3.67 \times 10^{-6}$ | 0.6982                                  | 0.1283 |
| 1000       | normal        | 13.5108          | 0.0230 | $1.42 \times 10^{-5}$ | $3.30 \times 10^{-6}$ | 0.3232                                  | 0.0863 |
| 1000       | loose         | 13.5150          | 0.0210 | $9.66 \times 10^{-6}$ | $2.08 \times 10^{-6}$ | 0.1942                                  | 0.0567 |
| 5000       | dense         | 13.5242          | 0.0211 | $2.37 \times 10^{-5}$ | $3.14 \times 10^{-6}$ | 0.6772                                  | 0.1551 |
| 5000       | normal        | 13.5168          | 0.0194 | $1.50 \times 10^{-5}$ | $2.30 \times 10^{-6}$ | 0.3261                                  | 0.0760 |
| 5000       | loose         | 13.5273          | 0.0183 | $9.71 \times 10^{-6}$ | $1.66 \times 10^{-6}$ | 0.1882                                  | 0.0550 |

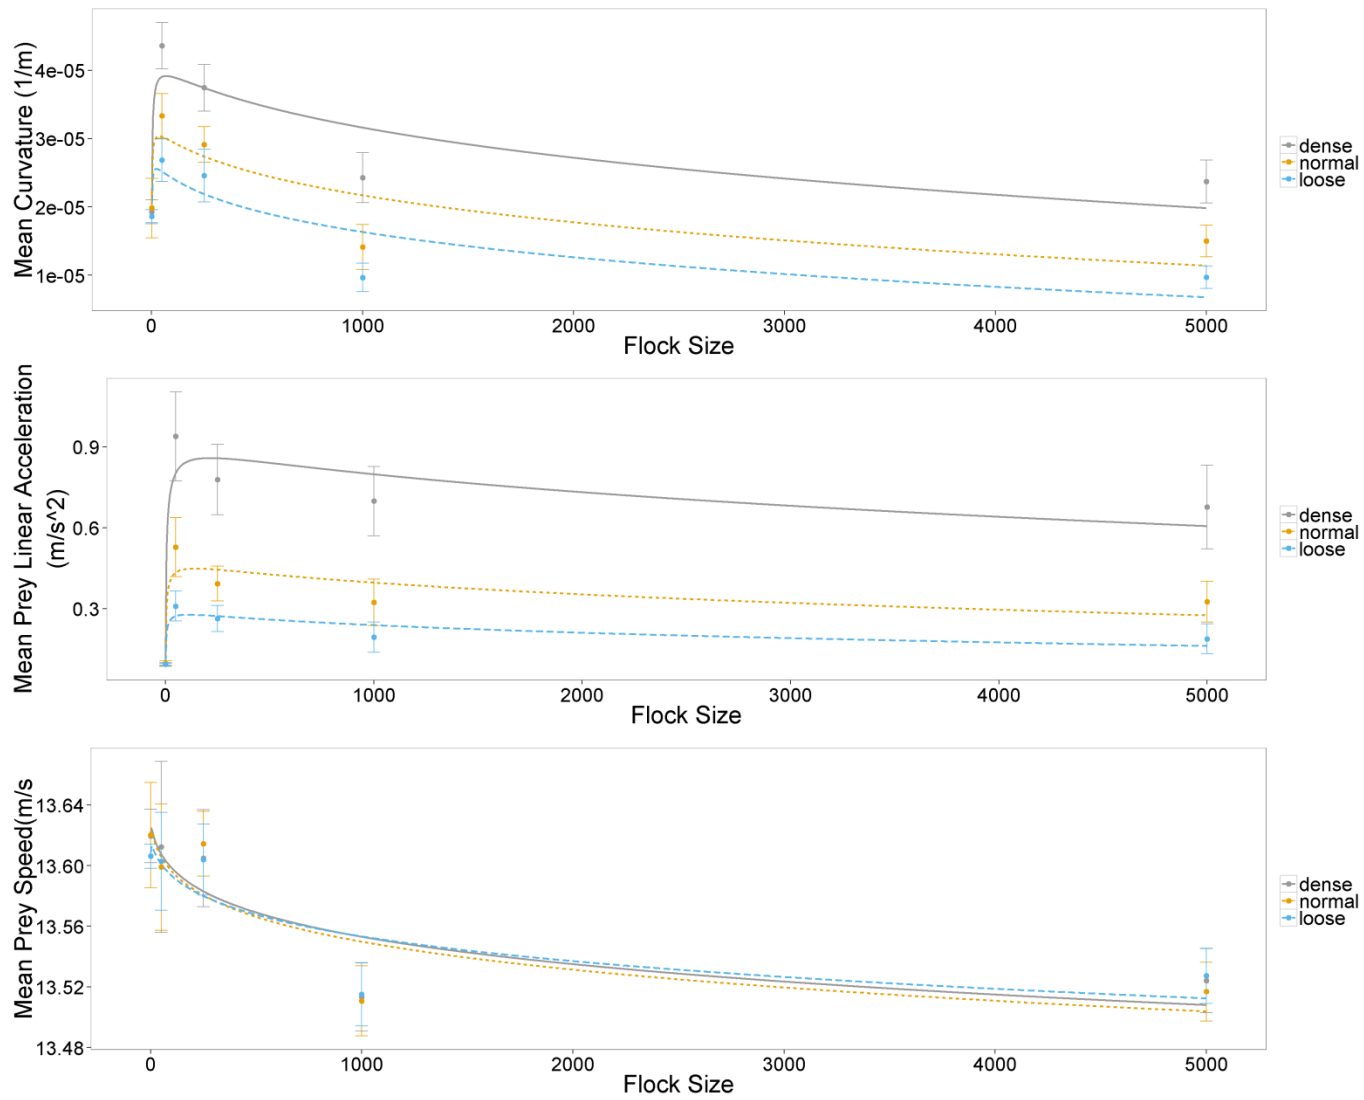

Figure 4- Graphs of prey bird movement measures by flock size and density, fitted lines are quadratic polynomials. Line colour and solidity indicate flock density. Error bars indicate standard deviation.
